# Supplementary material for: Facile molten-salt synthesis of double perovskite La2BMnO6 nanoparticles
Source: Royal Society of Chemistry journal article supplement (doi:10.1039/c2ra21789a), 2012-01-01
Supplement: c2ra21789a.pdf [file c2ra21789a.pdf]

## Supporting Information

### Facile molten-salt synthesis of double perovskite $\text{La}_2\text{BMnO}_6$ nanoparticles

Yuanbing Mao\*

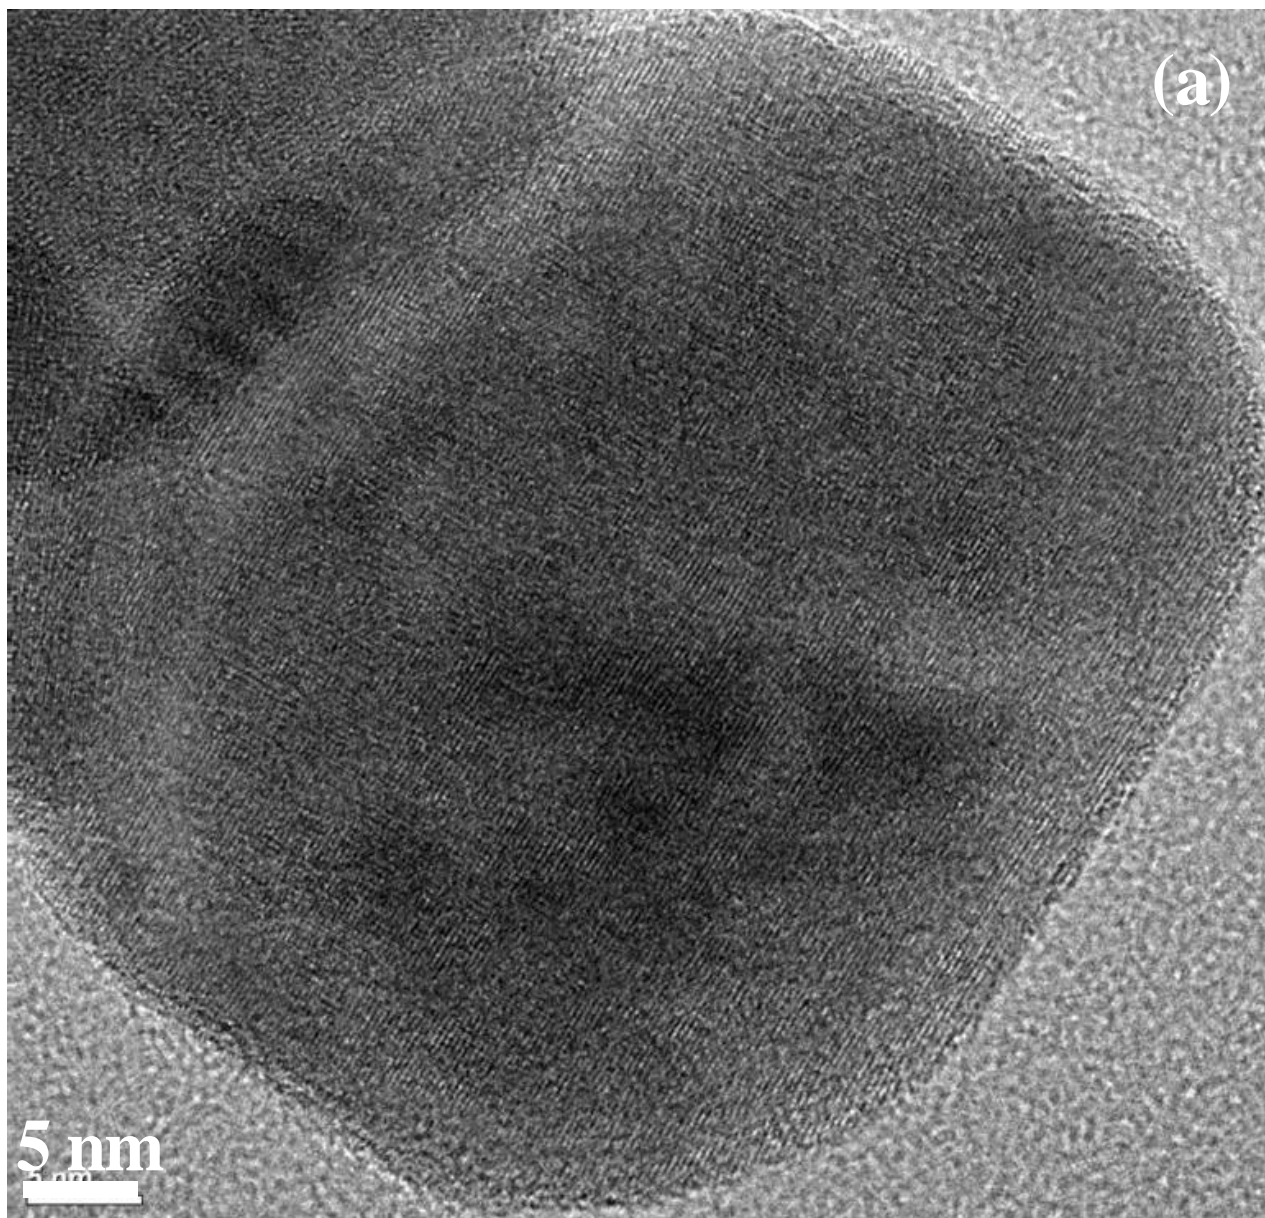

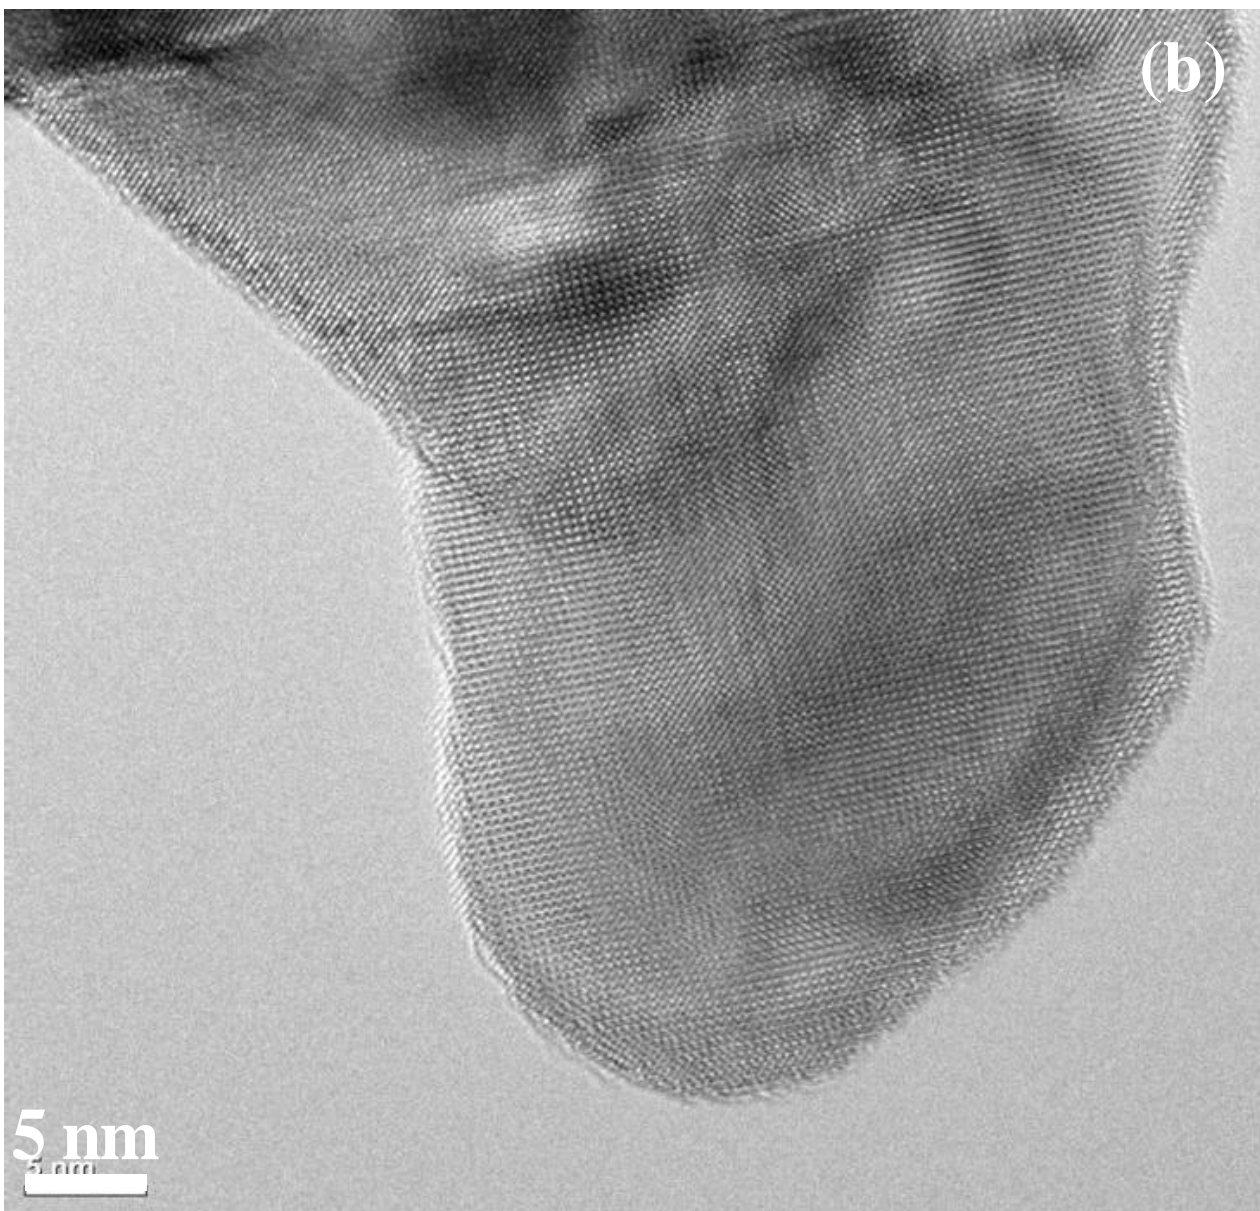

Figure S11 HRTEM images of the (a) LNMO and (b) LCMO nanoparticles.
